# Supplementary material for: Hypoactive delirium
Source: HighWire-hosted journal article supplement (doi:10.1136/bmj.j2047), 2017-05-25
Supplement: hosc038261.wi.pdf [file hosc038261.wi.pdf]

# Quietly delirious

Hypoactive delirium can be more difficult to recognise than hyperactive delirium, and is associated with worse outcomes. This infographic summarises the main differences between the two forms of delirium.

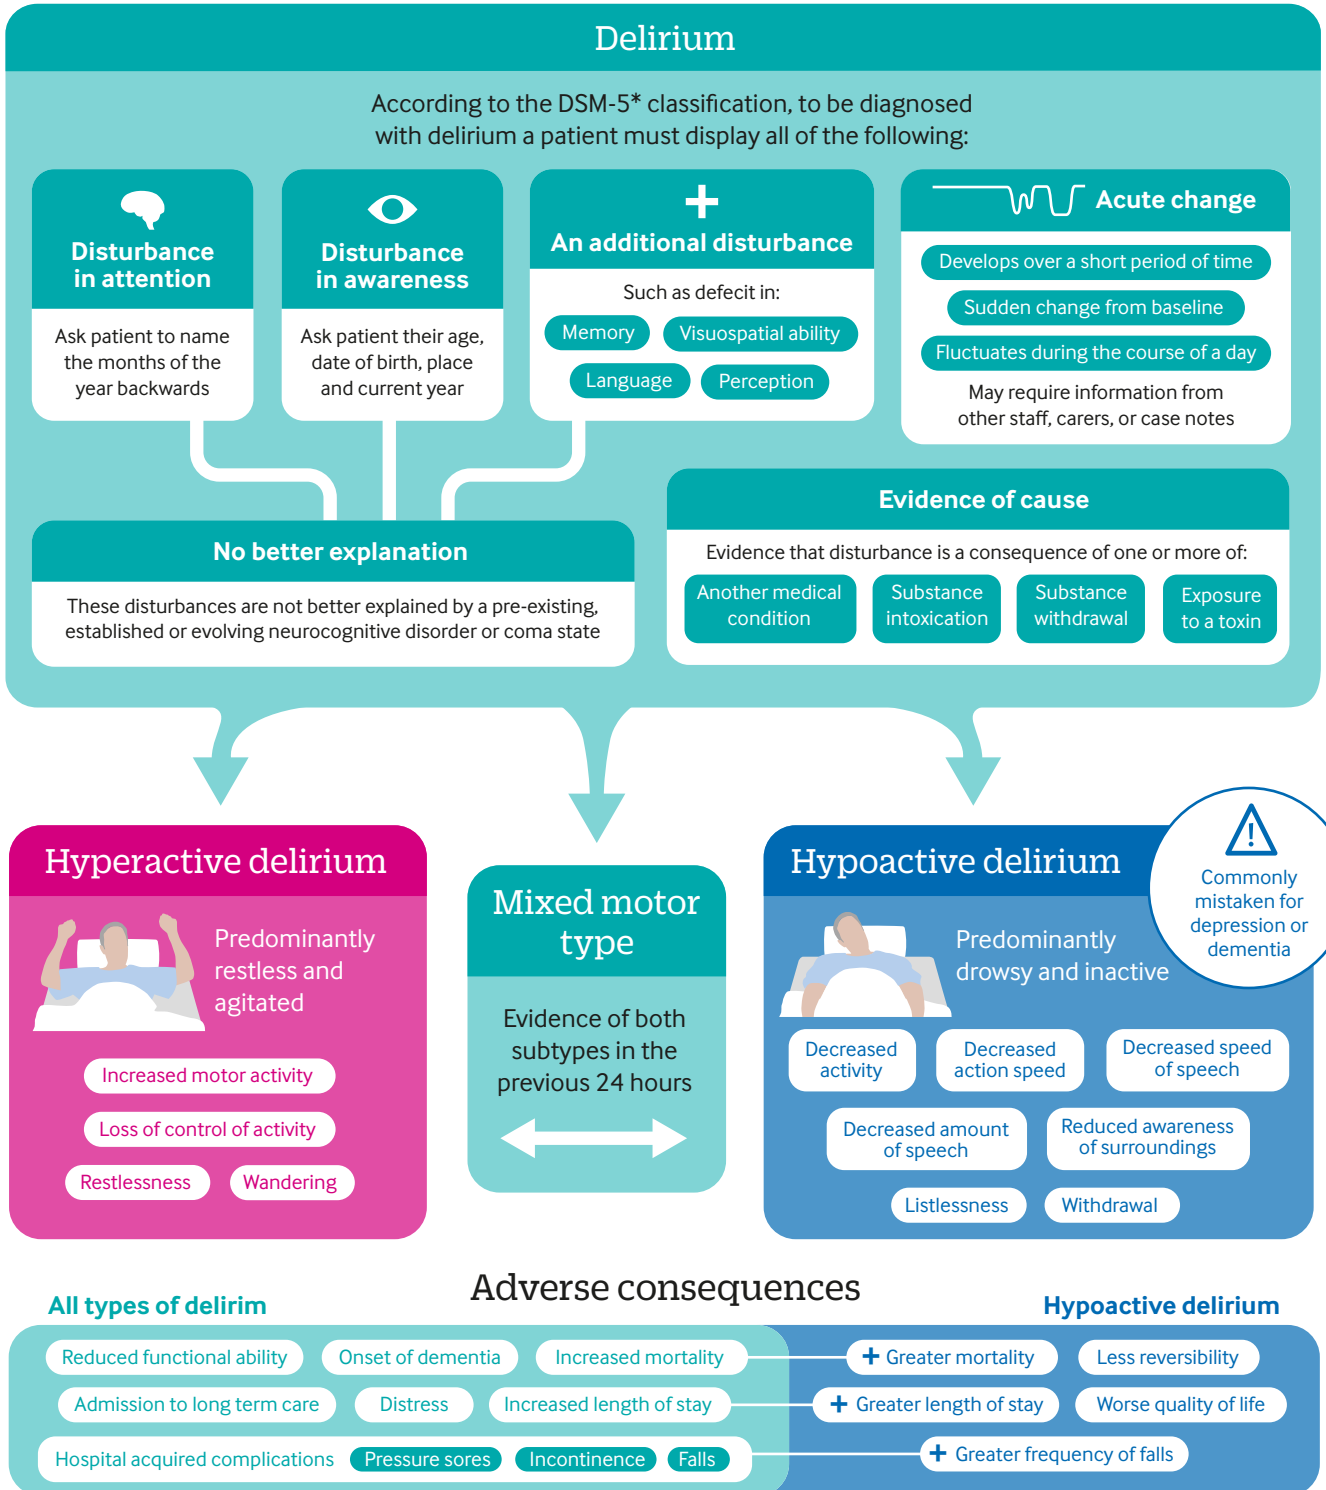

\* DSM-5 = Diagnostic and Statistical Manual of Mental Disorders (fifth edition)
